# Supplementary material for: Gambling in the Visual Periphery: A Conjoint-Measurement Analysis of Human Ability to Judge Visual Uncertainty
Source: PLoS Comput Biol. 2010 Dec 2;6(12):e1001023. doi: 10.1371/journal.pcbi.1001023 (PMC2996320; doi:10.1371/journal.pcbi.1001023)
Supplement: Text S1 — Proof for Equation 3. (0.06 MB DOC) [file pcbi.1001023.s001.doc]

**Text S1**

Suppose and , both in the form of Equation 1 but with different parameters, are the probabilities correct at eccentricity for each of Contrast 1 and 2, respectively. Suppose that eccentricity at Contrast 1 and eccentricity at Contrast 2 lead to the same probability correct. That is, . Substitute and from Equation 1, we get

.

If we cancel common constants and take the natural logarithm of both sides, the equation becomes

Suppose that the observer also has the same probability correct for Contrast 1 at eccentricity and Contrast 2 at eccentricity . Then

Subtracting this equation from the previous equation, we obtain a linear relation between the logarithms of eccentricities:

Let , , the equivalence transformation from Contrast 1 to Contrast 2 could then be written as
